# Supplementary figures and images for: Thirty-Year Trends in Mortality from Cerebrovascular Diseases in Korea
Source: PubMed Central journal article supplement — Korean Circ J. 2016 Jul 21;46(4):507–14. doi: 10.4070/kcj.2016.46.4.507 (PMC4965429; doi:10.4070/kcj.2016.46.4.507), 2016-07-21

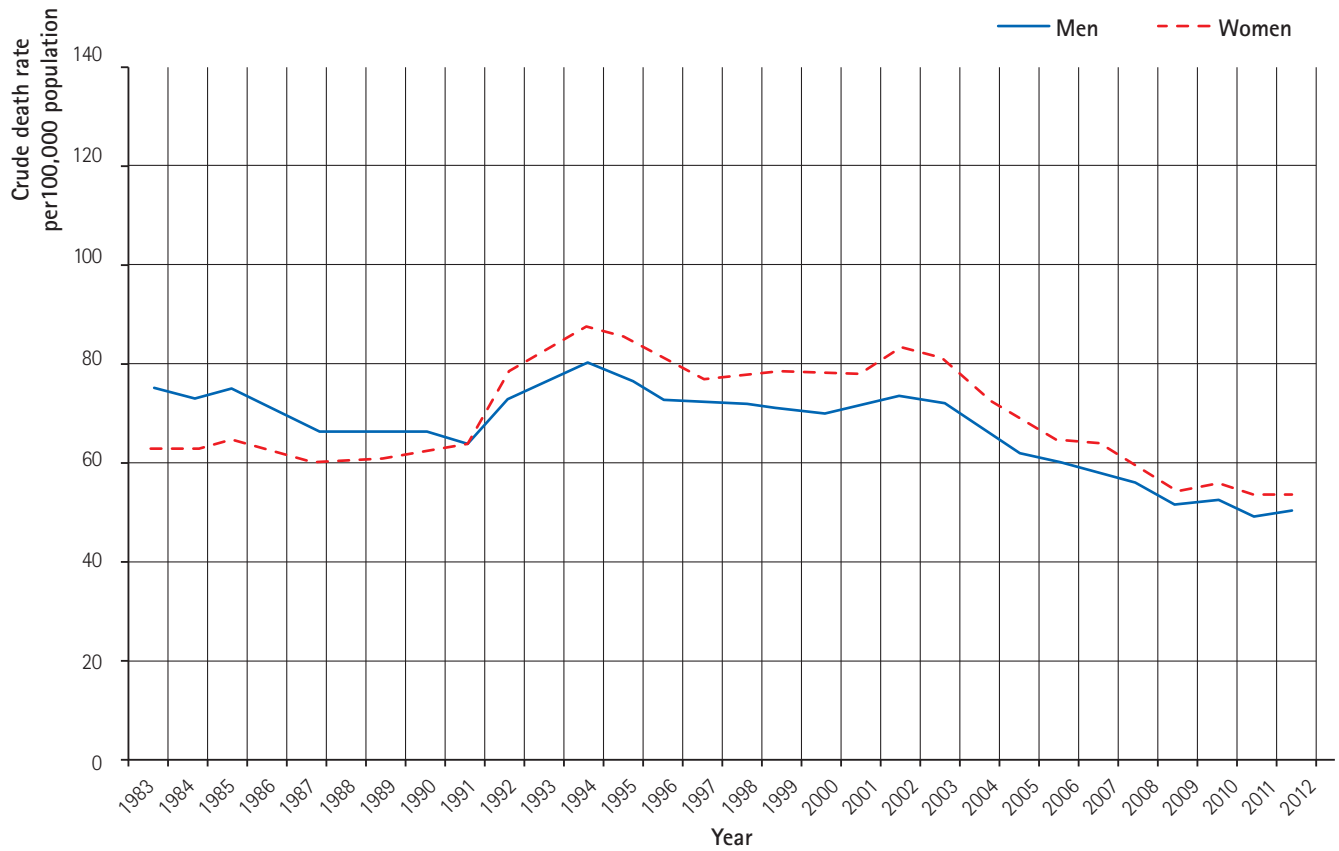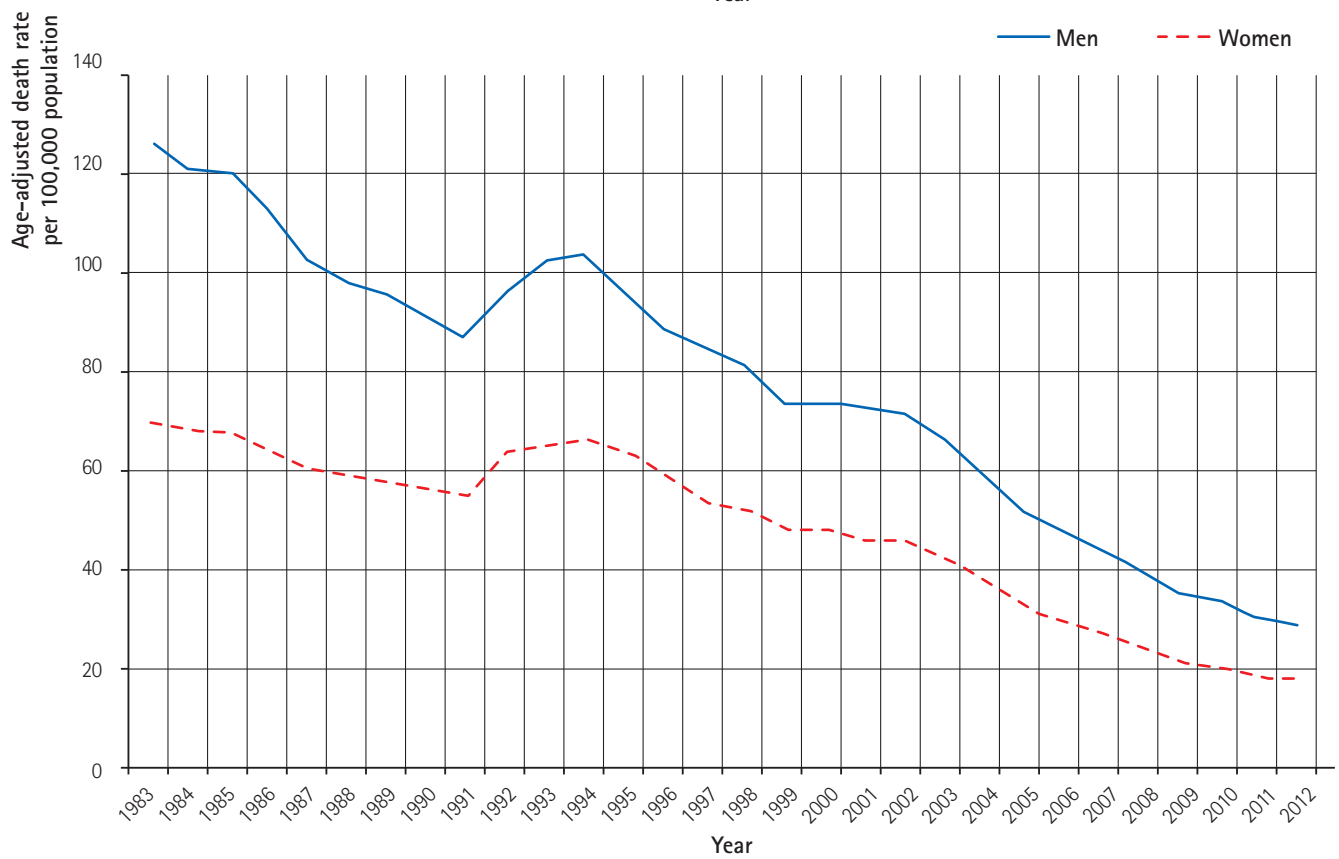

Supplementary Fig. 1. Crude and age-adjusted mortality from cerebrovascular disease (I60-I69).

Supplement: kcj-46-507-s001.pdf [file kcj-46-507-s001.pdf]

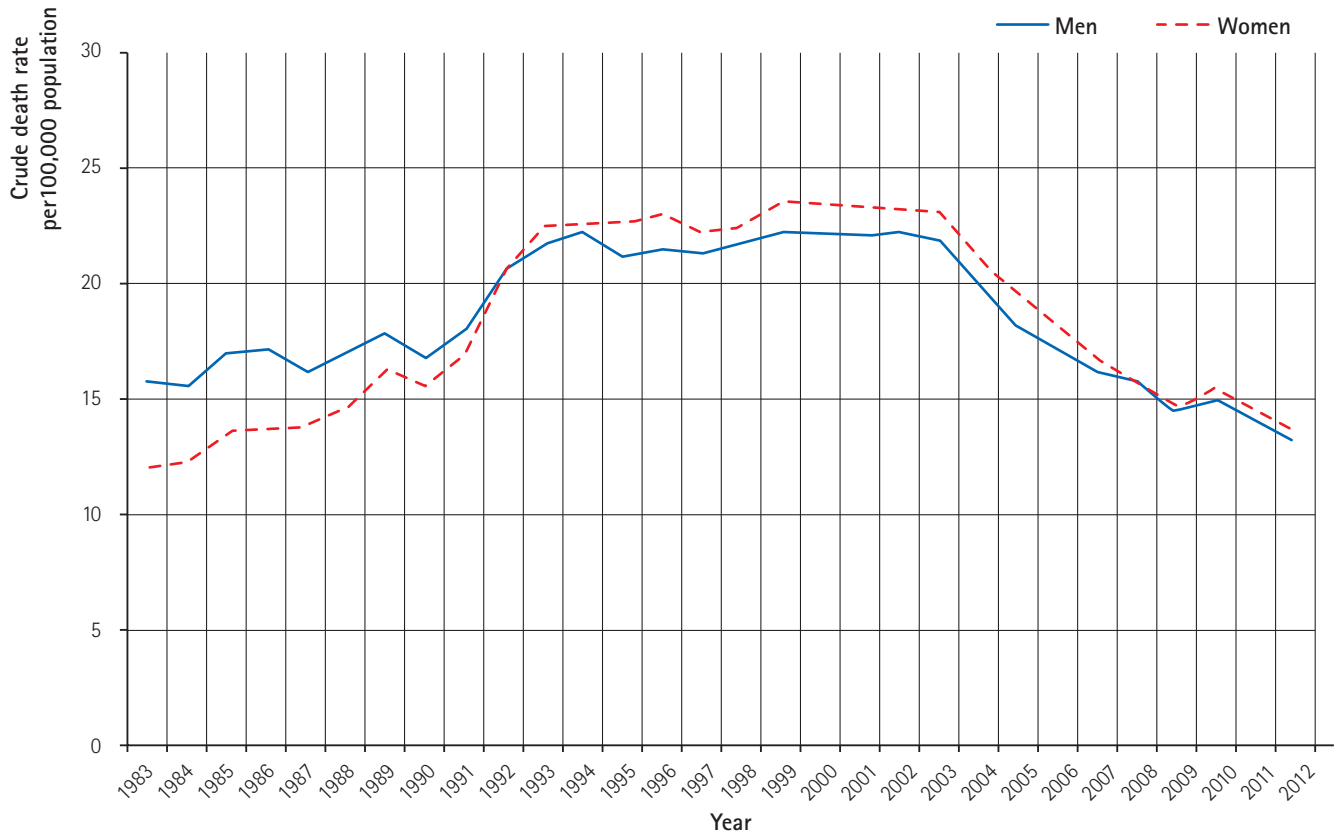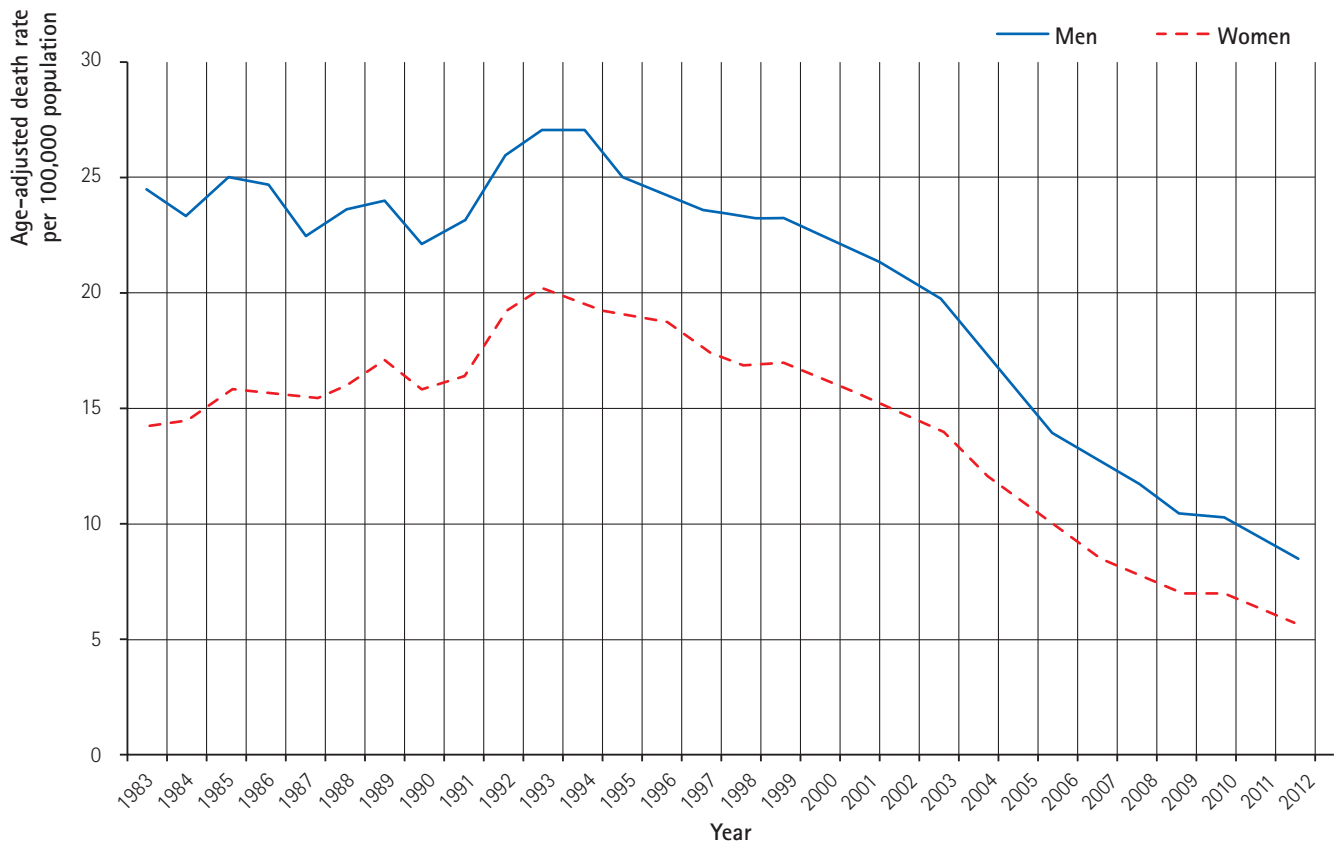

**Supplementary Fig. 2.** Crude and age-adjusted mortality from hemorrhagic stroke (I60-62).

Supplement: kcj-46-507-s002.pdf [file kcj-46-507-s002.pdf]

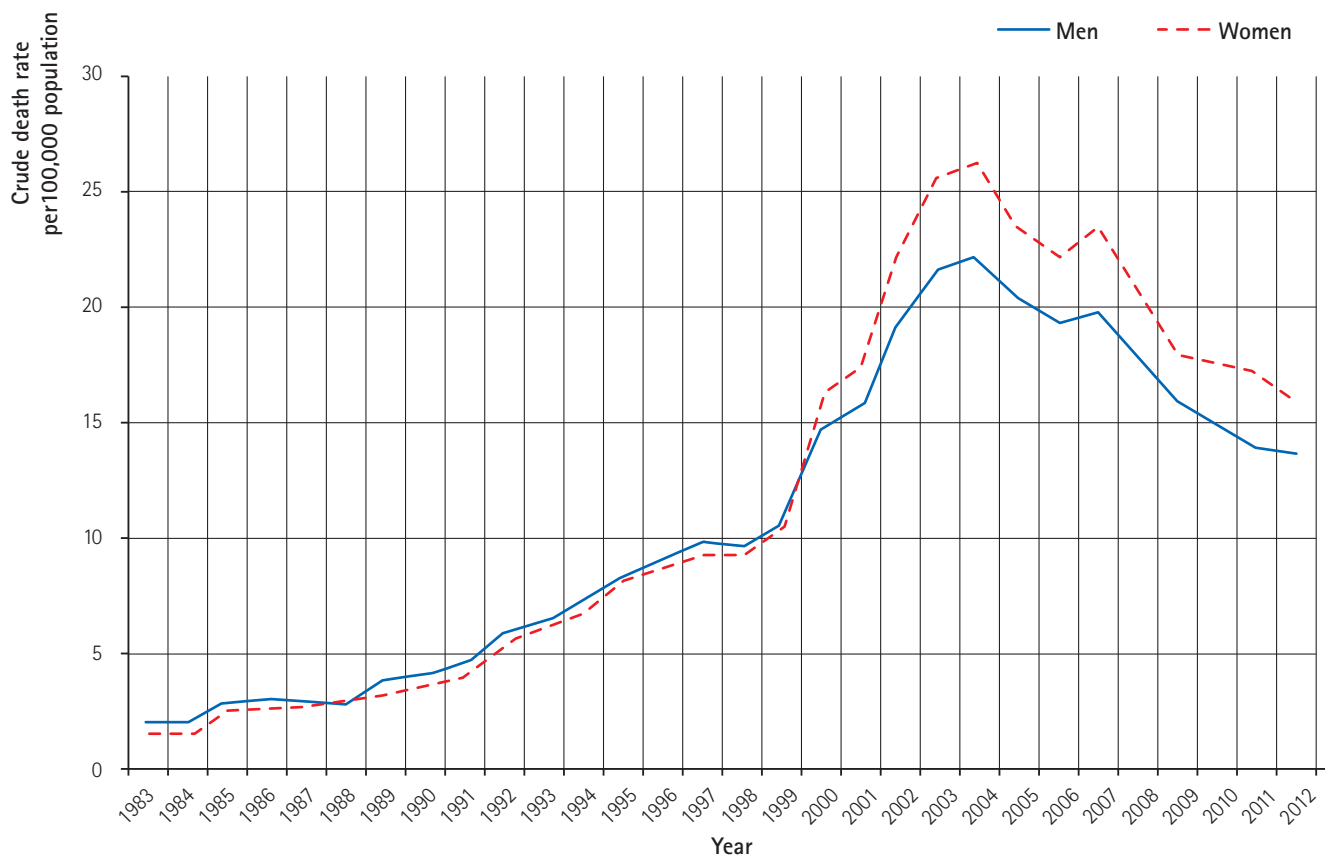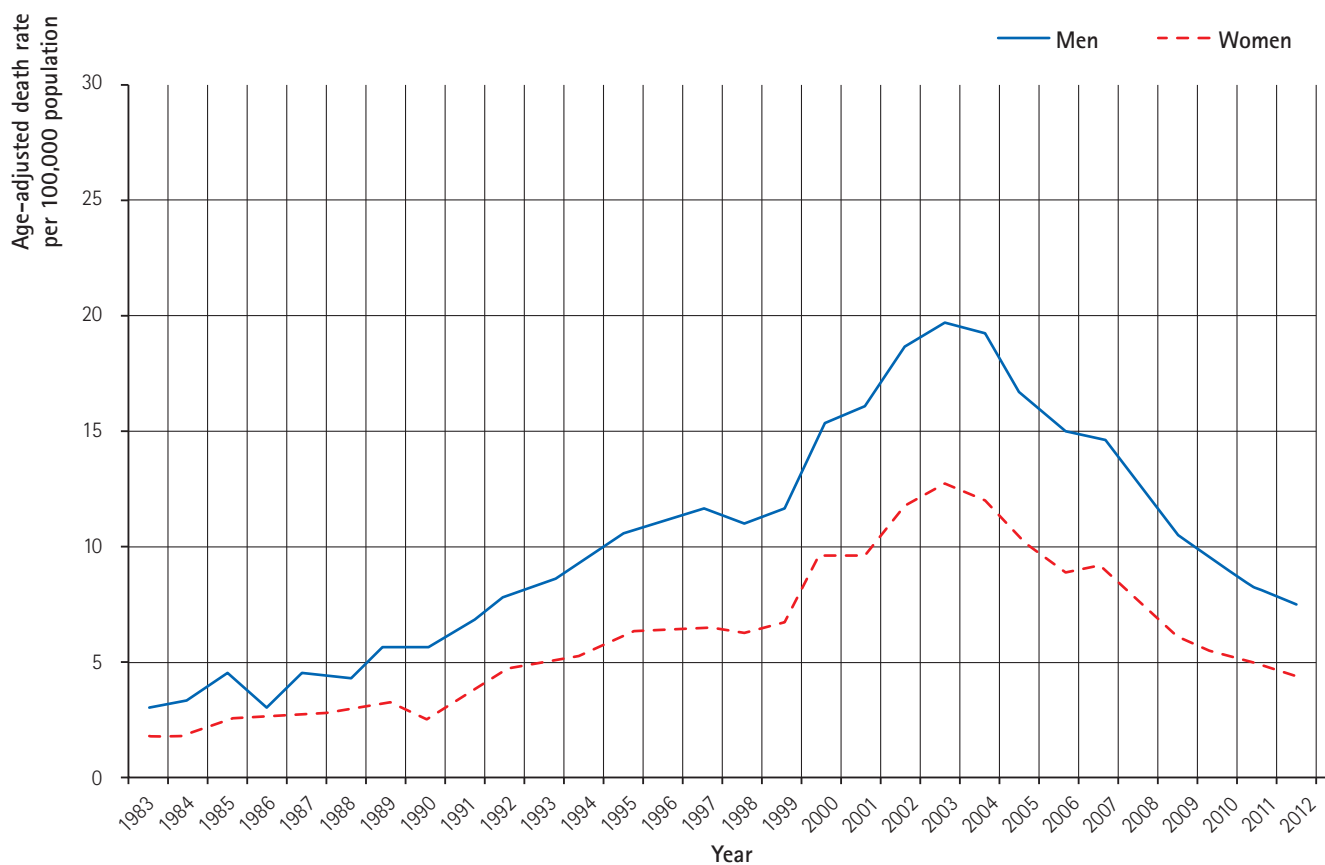

**Supplementary Fig. 3.** Crude and age-adjusted mortality rates from cerebral infarction (I63).

Supplement: kcj-46-507-s003.pdf [file kcj-46-507-s003.pdf]
